# Supplementary material
Source: publisher figshare collection journal article supplement (https://tandf.figshare.com/articles/dataset/_/13049813)
Supplement: Supplementary file 2 [file 3]

Supplementary File 1. Nyberg et al.

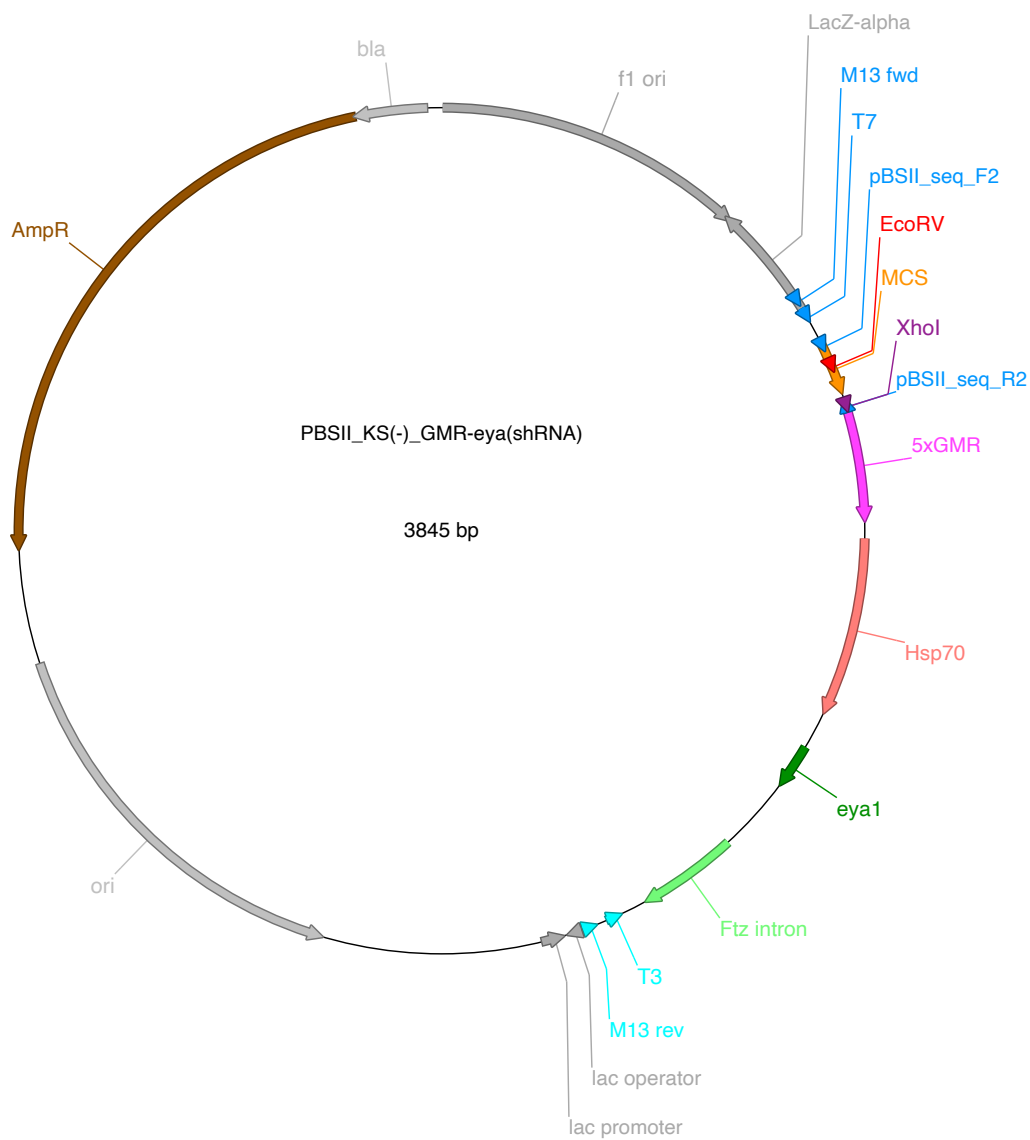

## pBS-GMR-*eya*(shRNA) Plasmid Sequence

Multi Cloning Site

GMR enhancer

Hsp70 promoter

Eya shRNA

Ftz intron

Nhe

XhoI

EcoR

EcoRV

XbaI

CTAAATTGTAAGCGTTAATATTTTGTAAAAATTCGCGTTAAATTTTTGTAAATCAGCTCATTTTTTTAACCAATAGG  
CCGAAATCGGCAAAATCCCTTATAAATCAAAAGAATAGACCGAGATAGGGTTGAGTGTGTTCCAGTTTGAACAAG  
AGTCCACTATTAAAGAACGTGGACTCCAACGTCAAAGGGCGAAAAACCGTCTATCAGGGCGATGGCCCACTACGTGA  
ACCATCACCTAATCAAGTTTTTTGGGGTCGAGGTGCCGTAAGCACTAAATCGGAACCCTAAAGGGAGCCCCGAT  
TTAGAGCTTGACGGGAAAGCCGGCGAACGTGGCGAGAAAGGAAGGGAAGAAAGCGAAAGGAGCGGGCGCTAGGGCG  
CTGGCAAGTGTAGCGGTACGCTGCGCGTAACCACCACACCCGCCGCGCTTAATGCGCCGCTACAGGGCGCGTCCCA  
TTCGCCATTAGGCTGCGCAACTGTTGGGAAGGGCGATCGGTGCGGGCCTCTTCGCTATTACGCCAGCTGGCGAAAG  
GGGGATGTGCTGCAAGGCGATTAAGTTGGGTAACGCCAGGGTTTTCCAGTCACGACGTTGTAAACGACGGCCAGT  
GAGCGCGCGTAATACGACTCACTATAGGGCGAATTGGAGCTCCACCGCGGTGGCGGCCGCTCTAGAACTAGTGGATC  
CCCCGGGCTGCAGGAATTCGATATCAAGCTTATCGATACCGTCGACCTCGAGGGGGGGCCCGGTACTCGCGAGCGAT  
CGCTCGAGCCCAGTGGAAACCCTTGAAATGCCTTTAAGTCGAGCCCAGTGGAAACCCTTGAAATGCCTTTAAGTCG  
AGCCCAGTGGAAACCCTTGAAATGCCTTTAAGTCGAGCCCAGTGGAAACCCTTGAAATGCCTTTAAGTCGAGCCCAG  
TGGAACCCTTGAAATGCCTTTAAGTCGACTCTAGGTTAATTAATCGGAAGCGAGCGCGGAGTATAAATAGAGGC  
GCTTCGTCTACGGAGCGACAATTCAATCAAACAAGCAAAGTGAACACGTCGCTAAGCGAAAGCTAAGCAAATAAAC  
AAGCGCAGCTGAACAAGCTAAACAATCTGCAGTAAAGTGAAGTTAAAGTGAATCAATTAAGTAACCAAGCAACCA  
AGTAAATCAACTGCAACTACTGAAATCTGCCAAGAAGTAATTATTGAATACAAGAAGAGAAGTCTGAATAGGGAATT  
GGGAATTGAGATCTGTTCTAGAAAACATCCATAAAACATCCCATATTAGCCGCTAGCAGTAACATGACTACTACT  
ACTACATAGTTATATTCAGCATATGTAGTAGTAGTAGTCATGTTGCAATTCAGGCGAGACATCGGAGTTGAAACT  
AAAAGTGAATTACTAGAGTGGACATATGCACCTAGGACTAGAGCAAAGTCTGATCTGCTAGACAATTGTTGGC  
ATCAGGTAGGCATCACACAGGATTAACAACCCCTAAAAATACACTTTGAAAATATTGAAAATATGTTTTGTATACA  
TTTTTGATATTTCAAACAATACGCAGTTATAAACTCATTAGCTAACCCATTTTTCTTTGCTTATGCTTACAGAT  
TGCAAAGAACTAGAGCCGCGGGTACCCAGCTTTTGTCCCTTTAGTGAGGGTTAATTGCGCGCTTGGCGTAATCAT  
GGTCATAGCTGTTTCTGTGTGAAATTGTTATCCGCTCACAAATCCACACAACATACGAGCCGGAAGCATAAAGTGT  
AAAGCCTGGGGTGCCTAATGAGTGAGCTAACTCACATTAATTGCGTTGCGCTCACTGCCCCGCTTTCCAGTCGGGAAA  
CCTGTGCTGCCAGCTGCATTAATGAATCGGCCAACGCGCGGGGAGAGGCGGTTTGGCGTATTGGGCGCTCTTCCGCTT  
CCTCGCTCACTGACTCGCTGCGCTCGGTGCTTTCGGCTGCGGCGAGCGGTATCAGCTCACTCAAAGGCGGTAATACGG  
TTATCCACAGAATCAGGGGATAACGCAGGAAAGAACATGTGAGCAAAAGGCCAGCAAAAGGCCAGGAACCGTAAAAA  
GGCCGCGTTGCTGGCGTTTTTCCATAGGCTCCGCCCCCTGACGAGCATCACAAAAATCGACGCTCAAGTCAGAGGT  
GGCGAAACCCGACAGGACTATAAAGATACCAGGCGTTTCCCGCTGGAAGCTCCCTCGTGCGCTCTCCTGTTCCGACC  
CTGCCGCTTACGGGATACCTGTCCGCTTTCTCCCTTCGGGAAGCGTGGCGCTTTCTCATAGCTCACGCTGTAGGTA  
TCTCAGTTCGGTGTAGGTGCTTCCGCTCCAAGCTGGGCTGTGTGCACGAACCCCCGTTAGCCCGACCGCTGCGCCT  
TATCCGGTAATATCGTCTTGAGTCCAACCCGGAAGACACGACTTATCGCCACTGGCAGCAGCCACTGGTAACAGG  
ATTAGCAGAGCGAGGTATGTAGGCGGTGTACAGAGTTCTTGAAGTGGTGGCTAACTACGGCTACACTAGAAGGAC  
AGTATTTGGTATCTGCGCTCTGCTGAAGCCAGTTACCTTCGGAAAAAGAGTTGGTAGCTCTTGATCCGGCAAACAAA  
CCACCGCTGGTAGCGGTGGTTTTTTTGTGTTGCAAGCAGCAGATTACGCGCAGAAAAAAGGATCTCAAGAAGATCCT  
TTGATCTTTTCTACGGGTCTGACGCTCAGTGAACGAAAACTCACGTTAAGGGATTTTGGTCATGAGATTATCAA  
AAGGATCTTACCTAGATCCTTTTAAATTAAAAATGAAGTTTTAAATCAATCTAAAGTATATATGAGTAAACTTGGT  
CTGACAGTTACCAATGCTTAATCAGTGAGGCACCTATCTCAGCGATCTGTCTATTTCGTTTCATCCATAGTTGCCTGA  
CTCCCCGTCGTGTAGATAACTACGATACGGGAGGGCTTACCATCTGGCCCCAGTGCTGCAATGATACCGCGAGACCC

ACGCTCACGGCTCCAGATTTATCAGCAATAAACCAGCCAGCCGGAAGGGCCGAGCGCAGAAGTGGTCCTGCAACTT  
TATCCGCCTCCATCCAGTCTATTAATTGTTGCCGGGAAGCTAGAGTAAGTAGTTCGCCAGTTAATAGTTTGCGCAAC  
GTTGTTGCCATTGCTACAGGCATCGTGGTGTACGCTCGTCGTTTGGTATGGCTTCATTTCAGCTCCGGTTCCCAACG  
ATCAAGGCGAGTTACATGATCCCCATGTTGTGCAAAAAAGCGGTTAGCTCCTTCGGTCCTCCGATCGTTGTCAGAA  
GTAAGTTGGCCGAGTGTATCACTCATGGTTATGGCAGCACTGCATAATTCTTTACTGTCATGCCATCCGTAAGA  
TGCTTTTCTGTGACTGGTGAGTACTCAACCAAGTCATTCTGAGAATAGTGTATGCGGCGACCGAGTTGCTCTTGCCC  
GGCGTCAATACGGGATAATACCGCGCCACATAGCAGAACTTTAAAAGTGCTCATCATTGGAAAACGTTCTTCGGGGC  
GAAAACCTCTCAAGGATCTTACCGCTGTTGAGATCCAGTTCGATGTAACCCACTCGTGCACCCAACGATCTTCAGCA  
TCTTTTACTTTTACCAGCGTTTCTGGGTGAGCAAAAACAGGAAGGCAAAATGCCGCAAAAAAGGGAATAAGGGCGAC  
ACGGAAATGTTGAATACTCATACTCTTCCTTTTTCAATATTATTGAAGCATTATCAGGGTTATTGTCTCATGAGCG  
GATACATATTTGAATGTATTTAGAAAAATAAACAAATAGGGGTTCCGCGCACATTTCCCCGAAAAGTGCCAC
